# Supplementary material
Source: PubMed Central journal article supplement (PMC4125395)
Supplement: 25ab3b879d79a81eb39c3b08aa370ba0_genetics.114.164012-5.pdf [file 25ab3b879d79a81eb39c3b08aa370ba0_genetics.114.164012-5.pdf]

**Table S2 Vector Table**

| Plasmid        | Description                                                  | Source                             |
|----------------|--------------------------------------------------------------|------------------------------------|
| pSW3801        | <i>NUP42/CEN/LEU2</i>                                        | This study                         |
| pSW3802        | <i>NUP42/CEN/TRP1</i>                                        | This study                         |
| pSW3645        | <i>nup42ΔFG/CEN/LEU2</i>                                     | This study                         |
| pSW3657        | <i>nup42ΔFG/CEN/TRP1</i>                                     | This study                         |
| pSW3662        | <i>nsp42-s-FG<sup>nup42</sup>/CEN/TRP1</i>                   | This study                         |
| pSW3658        | <i>nsp42-s-GLFG<sup>nup57</sup>/CEN/TRP1</i>                 | This study                         |
| pSW3659        | <i>nsp42-s-FxFG<sup>nsp1</sup>/CEN/TRP1</i>                  | This study                         |
| pSW3660        | <i>nsp42-s-GLFG<sup>nup116</sup>/CEN/TRP1</i>                | This study                         |
| pSW3661        | <i>nsp42-s-GLFG<sub>1-12</sub><sup>nup116</sup>/CEN/TRP1</i> | This study                         |
| pSW3841        | <i>nsp42-s-FG<sup>nup159</sup>/CEN/TRP1</i>                  | This study                         |
| pLG4           | <i>NUP159/URA</i>                                            | (GORSCH <i>et al.</i> 1995)        |
| pSW3647        | <i>NUP159/CEN/TRP1</i>                                       | This study                         |
| pSW3648        | <i>nup159ΔFG/CEN/TRP1</i>                                    | This study                         |
| pSW3692        | <i>nsp159-s-FG<sup>nup159</sup>/CEN/TRP1</i>                 | This study                         |
| pSW3693        | <i>nsp159-s-GLFG<sup>nup57</sup>/CEN/TRP1</i>                | This study                         |
| pSW3695        | <i>nsp159-s-FxFG<sup>nsp1</sup>/CEN/TRP1</i>                 | This study                         |
| pSW3694        | <i>nsp159-s-FG<sup>nup42</sup>/CEN/TRP1</i>                  | This study                         |
| pCA5005        | <i>DBP5/CEN/URA3</i>                                         | (TSENG <i>et al.</i> 1998)         |
| pSW410         | <i>GLE1/CEN/URA3</i>                                         | (MURPHY and WENTE 1996)            |
| pSW399         | <i>GLE1/CEN/LEU2</i>                                         | (MURPHY and WENTE 1996)            |
| pSW3345        | <i>gle1<sup>K377Q/K378Q</sup>/CEN/LEU2</i>                   | (ALCAZAR-ROMAN <i>et al.</i> 2010) |
| pSW3743        | <i>gle1-136<sup>APFQ</sup>/CEN/LEU2</i>                      | (FOLKMANN <i>et al.</i> 2013)      |
| pSW3742        | <i>gle1-149<sup>APFQ</sup>/CEN/LEU2</i>                      | (FOLKMANN <i>et al.</i> 2013)      |
| pSW3760        | <i>gle1-157<sup>APFQ</sup>/CEN/LEU2</i>                      | (FOLKMANN <i>et al.</i> 2013)      |
| pSW3936        | <i>gle1-FG<sup>nup42</sup></i>                               | This study                         |
| pSW3981        | <i>gle1-FG<sup>nup42</sup>-136<sup>APFQ</sup>/CEN/LEU2</i>   | This study                         |
| pSW3982        | <i>gle1-FG<sup>nup42</sup>-149<sup>APFQ</sup>/CEN/LEU2</i>   | This study                         |
| pSW3983        | <i>gle1-FG<sup>nup42</sup>-157<sup>APFQ</sup>/CEN/LEU2</i>   | This study                         |
| pRS316-MEX67   | <i>MEX67/CEN/URA3</i>                                        | (SEGREF <i>et al.</i> 1997)        |
| pRS314-MEX67   | <i>MEX67/CEN/TRP1</i>                                        | (SEGREF <i>et al.</i> 1997)        |
| pRS314-mex67-5 | <i>Mex67-5/CEN/TRP1</i>                                      | (SEGREF <i>et al.</i> 1997)        |
| pAC717         | <i>NAB2/CEN/LEU2</i>                                         | (MARFATIA <i>et al.</i> 2003)      |
| pSW3298        | <i>nab2-C437S/CEN/LEU2</i>                                   | (TRAN <i>et al.</i> 2007)          |
