# Supplementary material
Source: PubMed Central journal article supplement (PMC4125395)
Supplement: 63392dbc7a56b484edbb483cd0ae2869_genetics.114.164012-6.pdf [file 63392dbc7a56b484edbb483cd0ae2869_genetics.114.164012-6.pdf]

**Table S1 Strain Table**

| Strain        | Genotype                                                                                                               | Source                             |
|---------------|------------------------------------------------------------------------------------------------------------------------|------------------------------------|
| SWY2283       | <i>MATa ade2-1::ADE2 ura3-1 his3-11,15 leu2-3,112 lys2 can1-100</i>                                                    | (STRAWN <i>et al.</i> 2004)        |
| SWY5703       | <i>MATa ade2-1 ura3-1 his3-11,15 leu2-3 lys2 can1-100</i>                                                              | This Study                         |
| SWY2832       | <i>MATa ade2-1::ADE2 ura3-1 his3-11,15 leu2-3,112 lys2 can1-100 HA-LoxP-nup42ΔFG</i>                                   | (STRAWN <i>et al.</i> 2004)        |
| SWY2808       | <i>MATa ade2-1::ADE2 ura3-1 his3-11,15 leu2-3,112 lys2 can1-100 myc-LoxP-nup159ΔFG</i>                                 | (STRAWN <i>et al.</i> 2004)        |
| SWY2846       | <i>MATa ade2-1::ADE2 ura3-1 his3-11,15 leu2-3,112 lys2 can1-100 myc-LoxP-nup159ΔFG HA-LoxP-nup42ΔFG</i>                | (STRAWN <i>et al.</i> 2004)        |
| SWY5701       | <i>MATa ade2-1 ura3-1 leu2-3,112 his3-11,15 can1-100 myc-LoxP-nup159ΔFG HA-LoxP-nup42ΔFG</i>                           | This Study                         |
| SWY5825       | <i>MATa ade2-1::ADE2 ura3-1 his3-11,15 leu2-3,112 lys2 can1-100 myc-LoxP-nup159ΔFG HA-LoxP-nup42ΔFG-GFP:HIS3</i>       | This Study                         |
| SWY5826       | <i>MATa ade2-1::ADE2 ura3-1 his3-11,15 leu2-3,112 lys2 can1-100 myc-LoxP-nup159ΔFG-GFP:HIS3 nup42ΔFG</i>               | This Study                         |
| SWY5334       | <i>MATa ura3 leu2 his3 rat8-2 (dbp5) +pCA5005</i>                                                                      | This Study                         |
| SWY4301       | <i>MATa ura3 leu2 his3 trp1 myc-LoxP-nup159ΔFG rat8-2 (dbp5) +pCA5005</i>                                              | This Study                         |
| SWY5542       | <i>MATa ura3 leu2 his3 HA-LoxP-nup42ΔFG rat8-2 (dbp5) +pCA5005</i>                                                     | This Study                         |
| SWY4320       | <i>MATa ura3 leu2 his3 trp1 nup42ΔFG myc-LoxP-nup159ΔFG rat8-2 (dbp5) +pCA5005</i>                                     | This Study                         |
| SWY5209       | <i>MATa ura3-1 leu2-3,112 his3-11 trp1-1 gle1-4 +pSW410</i>                                                            | This Study                         |
| SWY5208       | <i>MATa ura3-1 leu2-3,112 his3-11 trp1-1 lys2 myc-LoxP-nup159ΔFG gle1-4 +pSW410</i>                                    | This Study                         |
| SWY5206       | <i>MATa ura3-1 leu2-3,112 his3-11 trp1-1 lys2 HA-LoxP-nup42ΔFG gle1-4 +pSW410</i>                                      | This Study                         |
| SWY5207       | <i>MATa ura3-1 leu2-3,112 his3-11 trp1-1 lys2 HA-LoxP-nup42ΔFG myc-LoxP-nup159ΔFG gle1-4 +pSW410</i>                   | This Study                         |
| Mex67 shuffle | <i>MATa ade2 his3 leu2 trp1 ura3 mex67::HIS3 +pRS316-MEX67</i>                                                         | (SEGREF <i>et al.</i> 1997)        |
| SWY5204       | <i>MATa ade2 his3 leu2 trp1 ura3 HA-LoxP-nup42ΔFG myc-LoxP-nup159ΔFG mex67::HIS3 +pRS316-MEX67</i>                     | This Study                         |
| SWY5697       | <i>MATa ade2-1 ura3-1 leu2-3,112 his3-11,15 trp1-1 can1-100 gle1::HIS +pSW3345</i>                                     | This Study                         |
| SWY5698       | <i>MATa ade2-1 ura3-1 leu2-3,112 his3-11,15 trp1-1 can1-100 myc-LoxP-nup159ΔFG HA-LoxP-nup42ΔFG gle1::HIS +pSW3345</i> | This Study                         |
| SWY5236       | <i>MATa ura3-1 his3-11,15 leu2-3,112 trp1-1 nab2::HIS3 +pAC717</i>                                                     | This Study                         |
| SWY5237       | <i>MATa ura3-1 his3-11,15 leu2-3,112 trp1-1 nab2::HIS3 +pSW3298</i>                                                    | This Study                         |
| SWY5238       | <i>MATa ura3-1 his3-11,15 leu2-3,112 trp1-1 HA-LoxP-nup42ΔFG myc-LoxP-nup159ΔFG nab2::HIS3 +pAC717</i>                 | This Study                         |
| SWY5239       | <i>MATa ura3-1 his3-11,15 leu2-3,112 trp1-1 HA-LoxP-nup42ΔFG myc-LoxP-nup159ΔFG nab2::HIS3 + pSW3298</i>               | This Study                         |
| SWY3826       | <i>MATa ade2-1 ura3-1 his3-11,15 leu2-3,112 trp1-1 gle1::HIS3 +pSW399</i>                                              | (ALCAZAR-ROMAN <i>et al.</i> 2010) |
| SWY4908       | <i>MATa ade2-1 ura3-1 his3-11,15 leu2-3,112 trp1-1 gle1::HIS3 +pSW3743</i>                                             | (FOLKMANN <i>et al.</i> 2013)      |
| SWY4909       | <i>MATa ade2-1 ura3-1 his3-11,15 leu2-3,112 trp1-1 gle1::HIS3 +pSW3742</i>                                             | (FOLKMANN <i>et al.</i> 2013)      |
| SWY4961       | <i>MATa ade2-1 ura3-1 his3-11,15 leu2-3,112 trp1-1 gle1::HIS3 +pSW3760</i>                                             | (FOLKMANN <i>et al.</i> 2013)      |
| SWY5878       | <i>MATa ade2-1 ura3-1 his3-11,15 leu2-3,112 trp1-1 gle1::HIS3 +pSW3936</i>                                             | This Study                         |
| SWY5879       | <i>MATa ade2-1 ura3-1 his3-11,15 leu2-3,112 trp1-1 gle1::HIS3</i>                                                      | This Study                         |

|                       |                                                                                                                                                |                               |
|-----------------------|------------------------------------------------------------------------------------------------------------------------------------------------|-------------------------------|
| SWY5880               | +pSW3981<br>MAT $\alpha$ <i>ade2-1 ura3-1 his3-11,15 leu2-3,112 trp1-1 gle1::HIS3</i><br>+pSW3982                                              | This Study                    |
| SWY5881               | MAT $\alpha$ <i>ade2-1 ura3-1 his3-11,15 leu2-3,112 trp1-1 gle1::HIS3</i><br>+pSW3983                                                          | This Study                    |
| SWY5875               | MAT $\alpha$ <i>ura3-1 his3-11,15 leu2-3,112 nup42::KAN<sup>R</sup> gle1::HIS3</i><br>+pSW410                                                  | This Study                    |
| SWY5882               | MAT $\alpha$ <i>ura3-1 his3-11,15 leu2-3,112 nup42::KAN<sup>R</sup> gle1::HIS3</i><br>+pSW399                                                  | This Study                    |
| SWY5883               | MAT $\alpha$ <i>ura3-1 his3-11,15 leu2-3,112 nup42::KAN<sup>R</sup> gle1::HIS3</i><br>+pSW3742                                                 | This Study                    |
| SWY5885               | MAT $\alpha$ <i>ura3-1 his3-11,15 leu2-3,112 nup42::KAN<sup>R</sup> gle1::HIS3</i><br>+pSW3936                                                 | This Study                    |
| SWY5887               | MAT $\alpha$ <i>ura3-1 his3-11,15 leu2-3,112 nup42::KAN<sup>R</sup> gle1::HIS3</i><br>+pSW3982                                                 | This Study                    |
| <i>nup42</i> $\Delta$ | MAT $\alpha$ <i>his3<math>\Delta</math>1 leu2<math>\Delta</math>0 lys2<math>\Delta</math>0 ura3<math>\Delta</math>1 nup42::KAN<sup>R</sup></i> | (WINZELER <i>et al.</i> 1999) |
| SWY2114               | MAT $\alpha$ <i>ade2-1 ura3-1 his3-11,15 trp1-1 leu2-3,112 ipk1::KAN<sup>R</sup></i><br><i>nup42::HIS3</i>                                     | (MILLER <i>et al.</i> 2004)   |
| SWY4303               | MAT $\alpha$ <i>ura3-1 his3-11,15 trp1-1 leu2-3,112 nup159::KAN<sup>R</sup></i><br>+pLG4                                                       | This Study                    |

---
