# Supplementary material
Source: PubMed Central journal article supplement (PMC4125395)
Supplement: 2332937d251db65936ab4b7ff885dff2_genetics.114.164012-1.pdf [file 2332937d251db65936ab4b7ff885dff2_genetics.114.164012-1.pdf]

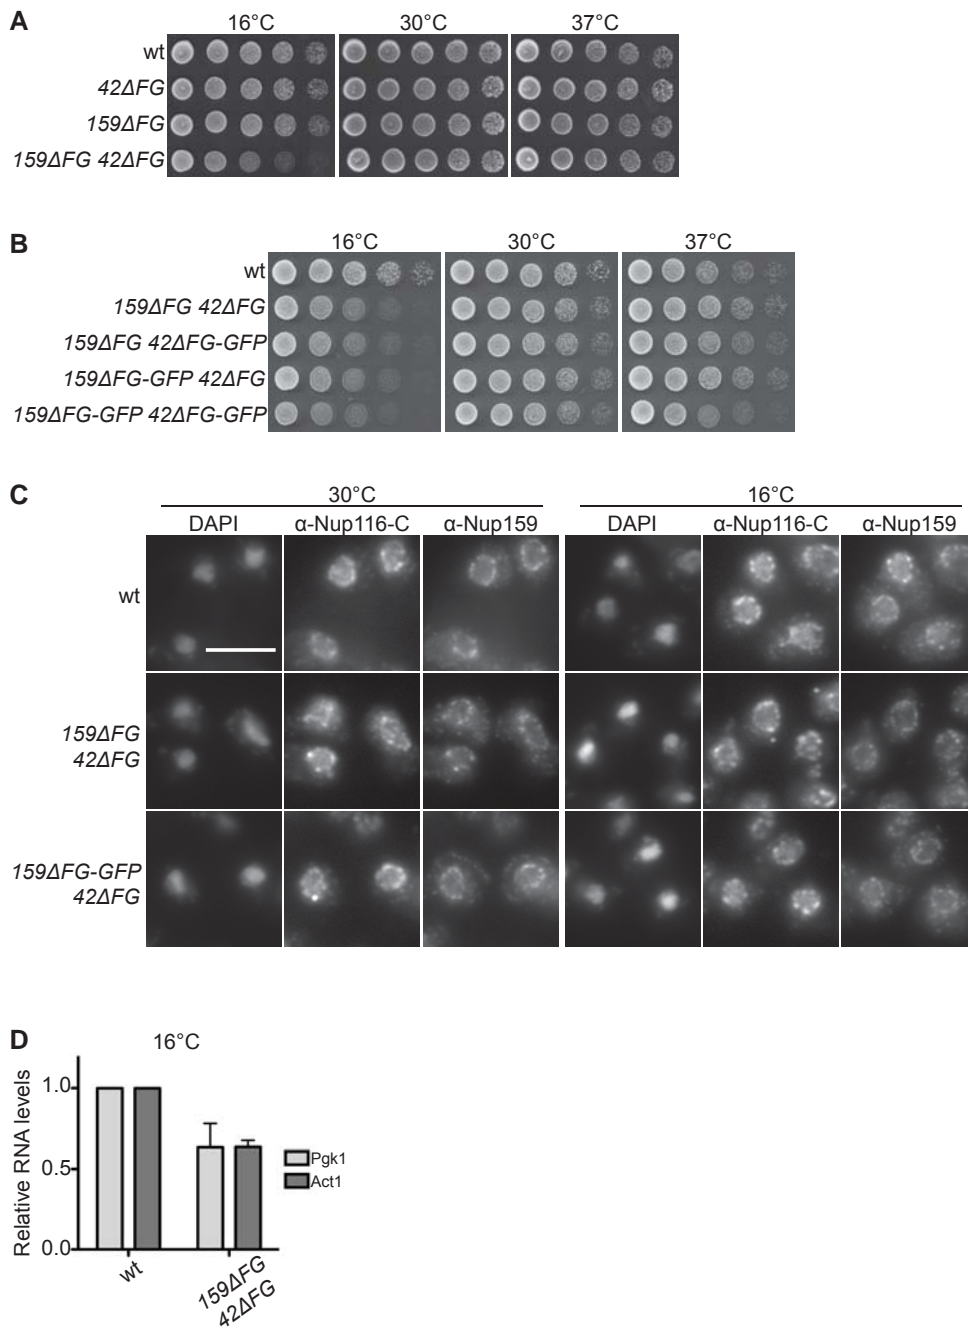

**Figure S1 The cold-sensitive mRNA export defect of *nup42ΔFG nup159ΔFG* is not due to mislocalized or non-functional *nup42* and *nup159* proteins or altered poly(A)<sup>+</sup> RNA levels.** (A) Deletion of both Nup42 and Nup159 FG domains results in a growth defect at cold temperatures. Yeast strains were grown at 30° and five-fold serially diluted on YPD plates for growth at the indicated temperature. (B) GFP fusions of *nup42ΔFG* and *nup159ΔFG* do not result in enhanced growth defects. Yeast strains were grown at 30° and five-fold serially diluted on YPD plates for growth at the indicated temperature. (C) *nup159ΔFG* and *nup159ΔFG-GFP* localize to the nuclear envelope at the permissive and restrictive temperatures. Indicated strains were grown at 30°, shifted to 16° or 30° overnight, and processed for immunofluorescence using the indicated antibodies. DAPI staining marks the nucleus. Scale bar, 5μm. (D) Steady-state levels of poly-adenylated transcripts are decreased in *nup42ΔFG nup159ΔFG*. Indicated strains were grown at 30°, shifted to 16° or 30° overnight, and total RNA was isolated. Q-PCR analysis of the resulting cDNA was performed for *Pgk1*, and *Act1*, and normalized to the non-poly-adenylated *Scr1* RNA. Wt levels were set to 1.0, and error bars indicate SEM of triplicate biological replicates. Levels are likely decreased due to feedback mechanisms that reduce transcription in mRNA export mutants.

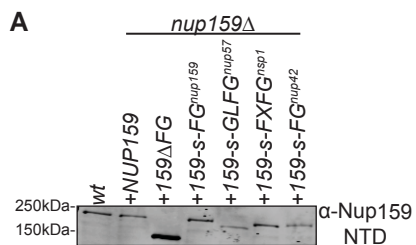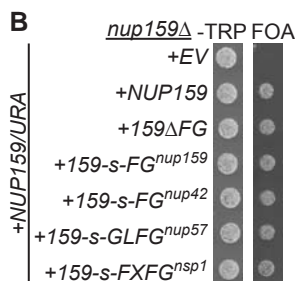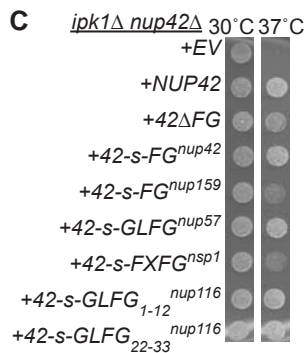

**Figure S2 FG swap constructs are expressed and functional.** (A) *nup159-s-FG* constructs are expressed. Lysates from a wt strain or *nup159Δ* mutants expressing *nup159-s-FG* vectors were separated by SDS-PAGE and immunoblotted using an α-Nup159-NTD antibody. (B) *nup159-s-FG* constructs are functional. *nup159Δ* strains containing empty vector (EV) or *nup159-s-FG/TRP* vectors were spotted onto -TRP synthetic media or 5-FOA at 25°. Growth on 5-FOA indicates functional complementation. (C) *nup42-s-FG* constructs are functional. *nup42Δ ipk1Δ* mutants containing empty vector (EV) or *nup42-s-FG/TRP* vectors were spotted onto -TRP synthetic media at the indicated temperature. Growth at 37° indicates functional complementation.

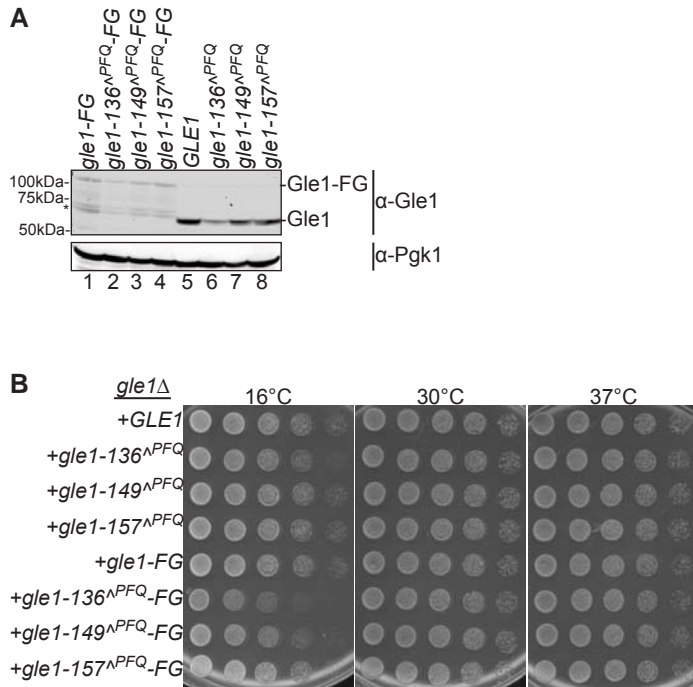

**Figure S3 *gle1-FG* constructs are expressed and show minimal growth defects.** (A) *gle1-FG* fusions are expressed.

Lysates from *gle1Δ* strains covered by the indicated vectors were separated by SDS-PAGE and immunoblotted using an  $\alpha$ -Gle1 antibody. Pgk1 was used as a loading control. (\*) Degradation products from the Nup42 FG domain. (B) *gle1<sup>NPFQ-FG</sup>* constructs display minimal growth defects. *gle1Δ* strains covered by the indicated vectors were grown at 30° and five-fold serially diluted on YPD plates for growth at the indicated temperatures.

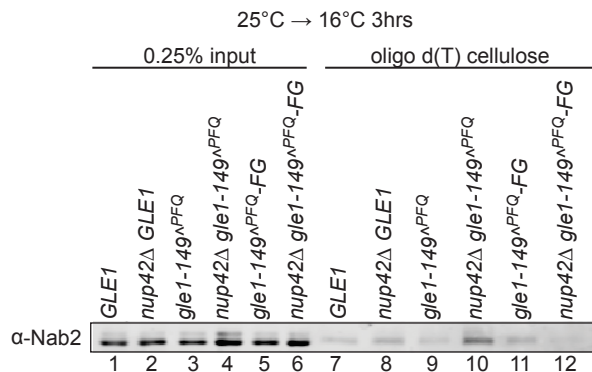

**Figure S4 Representative immunoblot from Figure 5E: Fusion of the Nup42 FG domain to the carboxy-terminus of Gle1 rescues the mRNP remodeling defect of *nup42Δ gle1-149<sup>ΔPFQ</sup>*.** The association of Nab2 protein with poly(A)<sup>+</sup> RNA was assessed by shifting strains to 16° for 3hrs, UV crosslinking, isolation of RNA by antisense chromatography, and immunoblotting after treatment with RNase.

**Table S1 Strain Table**

| Strain        | Genotype                                                                                                                | Source                             |
|---------------|-------------------------------------------------------------------------------------------------------------------------|------------------------------------|
| SWY2283       | <i>MATa ade2-1::ADE2 ura3-1 his3-11,15 leu2-3,112 lys2 can1-100</i>                                                     | (STRAWN <i>et al.</i> 2004)        |
| SWY5703       | <i>MATa ade2-1 ura3-1 his3-11,15 leu2-3 lys2 can1-100</i>                                                               | This Study                         |
| SWY2832       | <i>MATa ade2-1::ADE2 ura3-1 his3-11,15 leu2-3,112 lys2 can1-100 HA-LoxP-nup42ΔFG</i>                                    | (STRAWN <i>et al.</i> 2004)        |
| SWY2808       | <i>MATa ade2-1::ADE2 ura3-1 his3-11,15 leu2-3,112 lys2 can1-100 myc-LoxP-nup159ΔFG</i>                                  | (STRAWN <i>et al.</i> 2004)        |
| SWY2846       | <i>MATa ade2-1::ADE2 ura3-1 his3-11,15 leu2-3,112 lys2 can1-100 myc-LoxP-nup159ΔFG HA-LoxP-nup42ΔFG</i>                 | (STRAWN <i>et al.</i> 2004)        |
| SWY5701       | <i>MATa ade2-1 ura3-1 leu2-3,112 his3-11,15 can1-100 myc-LoxP-nup159ΔFG HA-LoxP-nup42ΔFG</i>                            | This Study                         |
| SWY5825       | <i>MATa ade2-1::ADE2 ura3-1 his3-11,15 leu2-3,112 lys2 can1-100 myc-LoxP-nup159ΔFG HA-LoxP-nup42ΔFG-GFP:HIS3</i>        | This Study                         |
| SWY5826       | <i>MATa ade2-1::ADE2 ura3-1 his3-11,15 leu2-3,112 lys2 can1-100 myc-LoxP-nup159ΔFG-GFP:HIS3 nup42ΔFG</i>                | This Study                         |
| SWY5334       | <i>MATa ura3 leu2 his3 rat8-2 (dbp5) +pCA5005</i>                                                                       | This Study                         |
| SWY4301       | <i>MATa ura3 leu2 his3 trp1 myc-LoxP-nup159ΔFG rat8-2 (dbp5) +pCA5005</i>                                               | This Study                         |
| SWY5542       | <i>MATa ura3 leu2 his3 HA-LoxP-nup42ΔFG rat8-2 (dbp5) +pCA5005</i>                                                      | This Study                         |
| SWY4320       | <i>MATa ura3 leu2 his3 trp1 nup42ΔFG myc-LoxP-nup159ΔFG rat8-2 (dbp5) +pCA5005</i>                                      | This Study                         |
| SWY5209       | <i>MATa ura3-1 leu2-3,112 his3-11 trp1-1 gle1-4 +pSW410</i>                                                             | This Study                         |
| SWY5208       | <i>MATa ura3-1 leu2-3,112 his3-11 trp1-1 lys2 myc-LoxP-nup159ΔFG gle1-4 +pSW410</i>                                     | This Study                         |
| SWY5206       | <i>MATa ura3-1 leu2-3,112 his3-11 trp1-1 lys2 HA-LoxP-nup42ΔFG gle1-4 +pSW410</i>                                       | This Study                         |
| SWY5207       | <i>MATa ura3-1 leu2-3,112 his3-11 trp1-1 lys2 HA-LoxP-nup42ΔFG myc-LoxP-nup159ΔFG gle1-4 +pSW410</i>                    | This Study                         |
| Mex67 shuffle | <i>MATa ade2 his3 leu2 trp1 ura3 mex67::HIS3 +pRS316-MEX67</i>                                                          | (SEGREF <i>et al.</i> 1997)        |
| SWY5204       | <i>MATa ade2 his3 leu2 trp1 ura3 HA-LoxP-nup42ΔFG myc-LoxP-nup159ΔFG mex67::HIS3 +pRS316-MEX67</i>                      | This Study                         |
| SWY5697       | <i>MATa ade2-1 ura3-1 leu2-3,112 his3-11,15 trp1-1 can1-100 gle1::HIS3 +pSW3345</i>                                     | This Study                         |
| SWY5698       | <i>MATa ade2-1 ura3-1 leu2-3,112 his3-11,15 trp1-1 can1-100 myc-LoxP-nup159ΔFG HA-LoxP-nup42ΔFG gle1::HIS3 +pSW3345</i> | This Study                         |
| SWY5236       | <i>MATa ura3-1 his3-11,15 leu2-3,112 trp1-1 nab2::HIS3 +pAC717</i>                                                      | This Study                         |
| SWY5237       | <i>MATa ura3-1 his3-11,15 leu2-3,112 trp1-1 nab2::HIS3 +pSW3298</i>                                                     | This Study                         |
| SWY5238       | <i>MATa ura3-1 his3-11,15 leu2-3,112 trp1-1 HA-LoxP-nup42ΔFG myc-LoxP-nup159ΔFG nab2::HIS3 +pAC717</i>                  | This Study                         |
| SWY5239       | <i>MATa ura3-1 his3-11,15 leu2-3,112 trp1-1 HA-LoxP-nup42ΔFG myc-LoxP-nup159ΔFG nab2::HIS3 +pSW3298</i>                 | This Study                         |
| SWY3826       | <i>MATa ade2-1 ura3-1 his3-11,15 leu2-3,112 trp1-1 gle1::HIS3 +pSW399</i>                                               | (ALCAZAR-ROMAN <i>et al.</i> 2010) |
| SWY4908       | <i>MATa ade2-1 ura3-1 his3-11,15 leu2-3,112 trp1-1 gle1::HIS3 +pSW3743</i>                                              | (FOLKMANN <i>et al.</i> 2013)      |
| SWY4909       | <i>MATa ade2-1 ura3-1 his3-11,15 leu2-3,112 trp1-1 gle1::HIS3 +pSW3742</i>                                              | (FOLKMANN <i>et al.</i> 2013)      |
| SWY4961       | <i>MATa ade2-1 ura3-1 his3-11,15 leu2-3,112 trp1-1 gle1::HIS3 +pSW3760</i>                                              | (FOLKMANN <i>et al.</i> 2013)      |
| SWY5878       | <i>MATa ade2-1 ura3-1 his3-11,15 leu2-3,112 trp1-1 gle1::HIS3 +pSW3936</i>                                              | This Study                         |
| SWY5879       | <i>MATa ade2-1 ura3-1 his3-11,15 leu2-3,112 trp1-1 gle1::HIS3</i>                                                       | This Study                         |

|                |                                                                                                                                                            |                               |
|----------------|------------------------------------------------------------------------------------------------------------------------------------------------------------|-------------------------------|
| SWY5880        | +pSW3981<br>MAT $\alpha$ <i>ade2-1 ura3-1 his3-11,15 leu2-3,112 trp1-1 gle1::HIS3</i>                                                                      | This Study                    |
| SWY5881        | +pSW3982<br>MAT $\alpha$ <i>ade2-1 ura3-1 his3-11,15 leu2-3,112 trp1-1 gle1::HIS3</i>                                                                      | This Study                    |
| SWY5875        | +pSW3983<br>MAT $\alpha$ <i>ura3-1 his3-11,15 leu2-3,112 nup42::KAN<sup>R</sup> gle1::HIS3</i>                                                             | This Study                    |
| SWY5882        | +pSW410<br>MAT $\alpha$ <i>ura3-1 his3-11,15 leu2-3,112 nup42::KAN<sup>R</sup> gle1::HIS3</i>                                                              | This Study                    |
| SWY5883        | +pSW399<br>MAT $\alpha$ <i>ura3-1 his3-11,15 leu2-3,112 nup42::KAN<sup>R</sup> gle1::HIS3</i>                                                              | This Study                    |
| SWY5885        | +pSW3742<br>MAT $\alpha$ <i>ura3-1 his3-11,15 leu2-3,112 nup42::KAN<sup>R</sup> gle1::HIS3</i>                                                             | This Study                    |
| SWY5887        | +pSW3936<br>MAT $\alpha$ <i>ura3-1 his3-11,15 leu2-3,112 nup42::KAN<sup>R</sup> gle1::HIS3</i>                                                             | This Study                    |
| nup42 $\Delta$ | +pSW3982<br>MAT $\alpha$ <i>his3<math>\Delta</math>1 leu2<math>\Delta</math>0 lys2<math>\Delta</math>0 ura3<math>\Delta</math>1 nup42::KAN<sup>R</sup></i> | (WINZELER <i>et al.</i> 1999) |
| SWY2114        | MAT $\alpha$ <i>ade2-1 ura3-1 his3-11,15 trp1-1 leu2-3,112 ipk1::KAN<sup>R</sup></i><br><i>nup42::HIS3</i>                                                 | (MILLER <i>et al.</i> 2004)   |
| SWY4303        | MAT $\alpha$ <i>ura3-1 his3-11,15 trp1-1 leu2-3,112 nup159::KAN<sup>R</sup></i><br>+pLG4                                                                   | This Study                    |

---

**Table S2 Vector Table**

| Plasmid        | Description                                                  | Source                             |
|----------------|--------------------------------------------------------------|------------------------------------|
| pSW3801        | <i>NUP42/CEN/LEU2</i>                                        | This study                         |
| pSW3802        | <i>NUP42/CEN/TRP1</i>                                        | This study                         |
| pSW3645        | <i>nup42ΔFG/CEN/LEU2</i>                                     | This study                         |
| pSW3657        | <i>nup42ΔFG/CEN/TRP1</i>                                     | This study                         |
| pSW3662        | <i>nsp42-s-FG<sup>nup42</sup>/CEN/TRP1</i>                   | This study                         |
| pSW3658        | <i>nsp42-s-GLFG<sup>nup57</sup>/CEN/TRP1</i>                 | This study                         |
| pSW3659        | <i>nsp42-s-FxFG<sup>nsp1</sup>/CEN/TRP1</i>                  | This study                         |
| pSW3660        | <i>nsp42-s-GLFG<sup>nup116</sup>/CEN/TRP1</i>                | This study                         |
| pSW3661        | <i>nsp42-s-GLFG<sub>1-12</sub><sup>nup116</sup>/CEN/TRP1</i> | This study                         |
| pSW3841        | <i>nsp42-s-FG<sup>nup159</sup>/CEN/TRP1</i>                  | This study                         |
| pLG4           | <i>NUP159/URA</i>                                            | (GORSCH <i>et al.</i> 1995)        |
| pSW3647        | <i>NUP159/CEN/TRP1</i>                                       | This study                         |
| pSW3648        | <i>nup159ΔFG/CEN/TRP1</i>                                    | This study                         |
| pSW3692        | <i>nsp159-s-FG<sup>nup159</sup>/CEN/TRP1</i>                 | This study                         |
| pSW3693        | <i>nsp159-s-GLFG<sup>nup57</sup>/CEN/TRP1</i>                | This study                         |
| pSW3695        | <i>nsp159-s-FxFG<sup>nsp1</sup>/CEN/TRP1</i>                 | This study                         |
| pSW3694        | <i>nsp159-s-FG<sup>nup42</sup>/CEN/TRP1</i>                  | This study                         |
| pCA5005        | <i>DBP5/CEN/URA3</i>                                         | (TSENG <i>et al.</i> 1998)         |
| pSW410         | <i>GLE1/CEN/URA3</i>                                         | (MURPHY and WENTE 1996)            |
| pSW399         | <i>GLE1/CEN/LEU2</i>                                         | (MURPHY and WENTE 1996)            |
| pSW3345        | <i>gle1<sup>K377Q/K378Q</sup>/CEN/LEU2</i>                   | (ALCAZAR-ROMAN <i>et al.</i> 2010) |
| pSW3743        | <i>gle1-136<sup>APFQ</sup>/CEN/LEU2</i>                      | (FOLKMANN <i>et al.</i> 2013)      |
| pSW3742        | <i>gle1-149<sup>APFQ</sup>/CEN/LEU2</i>                      | (FOLKMANN <i>et al.</i> 2013)      |
| pSW3760        | <i>gle1-157<sup>APFQ</sup>/CEN/LEU2</i>                      | (FOLKMANN <i>et al.</i> 2013)      |
| pSW3936        | <i>gle1-FG<sup>nup42</sup></i>                               | This study                         |
| pSW3981        | <i>gle1-FG<sup>nup42</sup>-136<sup>APFQ</sup>/CEN/LEU2</i>   | This study                         |
| pSW3982        | <i>gle1-FG<sup>nup42</sup>-149<sup>APFQ</sup>/CEN/LEU2</i>   | This study                         |
| pSW3983        | <i>gle1-FG<sup>nup42</sup>-157<sup>APFQ</sup>/CEN/LEU2</i>   | This study                         |
| pRS316-MEX67   | <i>MEX67/CEN/URA3</i>                                        | (SEGREF <i>et al.</i> 1997)        |
| pRS314-MEX67   | <i>MEX67/CEN/TRP1</i>                                        | (SEGREF <i>et al.</i> 1997)        |
| pRS314-mex67-5 | <i>Mex67-5/CEN/TRP1</i>                                      | (SEGREF <i>et al.</i> 1997)        |
| pAC717         | <i>NAB2/CEN/LEU2</i>                                         | (MARFATIA <i>et al.</i> 2003)      |
| pSW3298        | <i>nab2-C437S/CEN/LEU2</i>                                   | (TRAN <i>et al.</i> 2007)          |

#### SUPPLEMENTAL LITERATURE CITED

- ALCAZAR-ROMAN, A. R., T. A. BOLGER and S. R. WENTE, 2010 Control of mRNA export and translation termination by inositol hexakisphosphate requires specific interaction with Gle1. *J Biol Chem* **285**: 16683-16692.
- FOLKMANN, A. W., S. E. COLLIER, X. ZHAN, ADITI, M. D. OHI *et al.*, 2013 Gle1 functions during mRNA export in an oligomeric complex that is altered in human disease. *Cell* **155**: 582-593.
- GORSCH, L. C., T. C. DOCKENDORFF and C. N. COLE, 1995 A conditional allele of the novel repeat-containing yeast nucleoporin RAT7/NUP159 causes both rapid cessation of mRNA export and reversible clustering of nuclear pore complexes. *J Cell Biol* **129**: 939-955.
- MARFATIA, K. A., E. B. CRAFTON, D. M. GREEN and A. H. CORBETT, 2003 Domain analysis of the *Saccharomyces cerevisiae* heterogeneous nuclear ribonucleoprotein, Nab2p. Dissecting the requirements for Nab2p-facilitated poly(A) RNA export. *J Biol Chem* **278**: 6731-6740.
- MILLER, A. L., M. SUNTHARALINGAM, S. L. JOHNSON, A. AUDHYA, S. D. EMR *et al.*, 2004 Cytoplasmic inositol hexakisphosphate production is sufficient for mediating the Gle1-mRNA export pathway. *J Biol Chem* **279**: 51022-51032.
- MURPHY, R., and S. R. WENTE, 1996 An RNA-export mediator with an essential nuclear export signal. *Nature* **383**: 357-360.
- SEGREF, A., K. SHARMA, V. DOYE, A. HELLWIG, J. HUBER *et al.*, 1997 Mex67p, a novel factor for nuclear mRNA export, binds to both poly(A)+ RNA and nuclear pores. *EMBO J* **16**: 3256-3271.
- STRAWN, L. A., T. SHEN, N. SHULGA, D. S. GOLDFARB and S. R. WENTE, 2004 Minimal nuclear pore complexes define FG repeat domains essential for transport. *Nat Cell Biol* **6**: 197-206.
- TRAN, E. J., Y. ZHOU, A. H. CORBETT and S. R. WENTE, 2007 The DEAD-box protein Dbp5 controls mRNA export by triggering specific RNA:protein remodeling events. *Mol Cell* **28**: 850-859.
- TSENG, S. S., P. L. WEAVER, Y. LIU, M. HITOMI, A. M. TARTAKOFF *et al.*, 1998 Dbp5p, a cytosolic RNA helicase, is required for poly(A)+ RNA export. *EMBO J* **17**: 2651-2662.
- WINZELER, E. A., D. D. SHOEMAKER, A. ASTROMOFF, H. LIANG, K. ANDERSON *et al.*, 1999 Functional characterization of the *S. cerevisiae* genome by gene deletion and parallel analysis. *Science* **285**: 901-906.
