# Supplementary material
Source: PubMed Central journal article supplement (PMC4125395)
Supplement: ccf29c636d9db17503469dd1804ebd42_genetics.114.164012-2.pdf [file ccf29c636d9db17503469dd1804ebd42_genetics.114.164012-2.pdf]

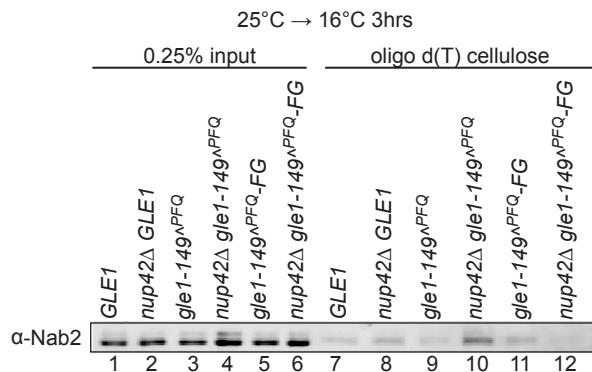

**Figure S4 Representative immunoblot from Figure 5E: Fusion of the Nup42 FG domain to the carboxy-terminus of Gle1 rescues the mRNP remodeling defect of *nup42Δ gle1-149<sup>ΔPFQ</sup>*.** The association of Nab2 protein with poly(A)<sup>+</sup> RNA was assessed by shifting strains to 16° for 3hrs, UV crosslinking, isolation of RNA by antisense chromatography, and immunoblotting after treatment with RNase.
