# Supplementary material
Source: PubMed Central journal article supplement (PMC4125395)
Supplement: ce83569736b7f881b8619cc303d6818f_genetics.114.164012-4.pdf [file ce83569736b7f881b8619cc303d6818f_genetics.114.164012-4.pdf]

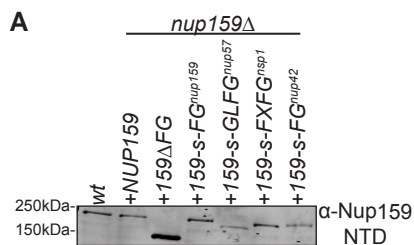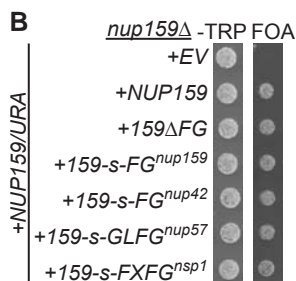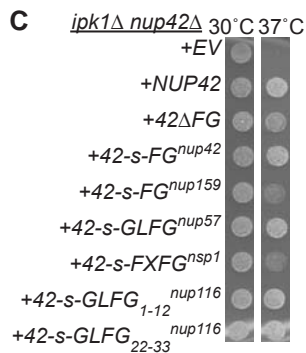

**Figure S2 FG swap constructs are expressed and functional.** (A) *nup159-s-FG* constructs are expressed. Lysates from a wt strain or *nup159Δ* mutants expressing *nup159-s-FG* vectors were separated by SDS-PAGE and immunoblotted using an α-Nup159-NTD antibody. (B) *nup159-s-FG* constructs are functional. *nup159Δ* strains containing empty vector (EV) or *nup159-s-FG/TRP* vectors were spotted onto -TRP synthetic media or 5-FOA at 25°. Growth on 5-FOA indicates functional complementation. (C) *nup42-s-FG* constructs are functional. *nup42Δ ipk1Δ* mutants containing empty vector (EV) or *nup42-s-FG/TRP* vectors were spotted onto -TRP synthetic media at the indicated temperature. Growth at 37° indicates functional complementation.
