# Supplementary material
Source: PubMed Central journal article supplement (PMC4125395)
Supplement: da36d3bbad7bd0ab3f1563140fd75e04_genetics.114.164012-7.pdf [file da36d3bbad7bd0ab3f1563140fd75e04_genetics.114.164012-7.pdf]

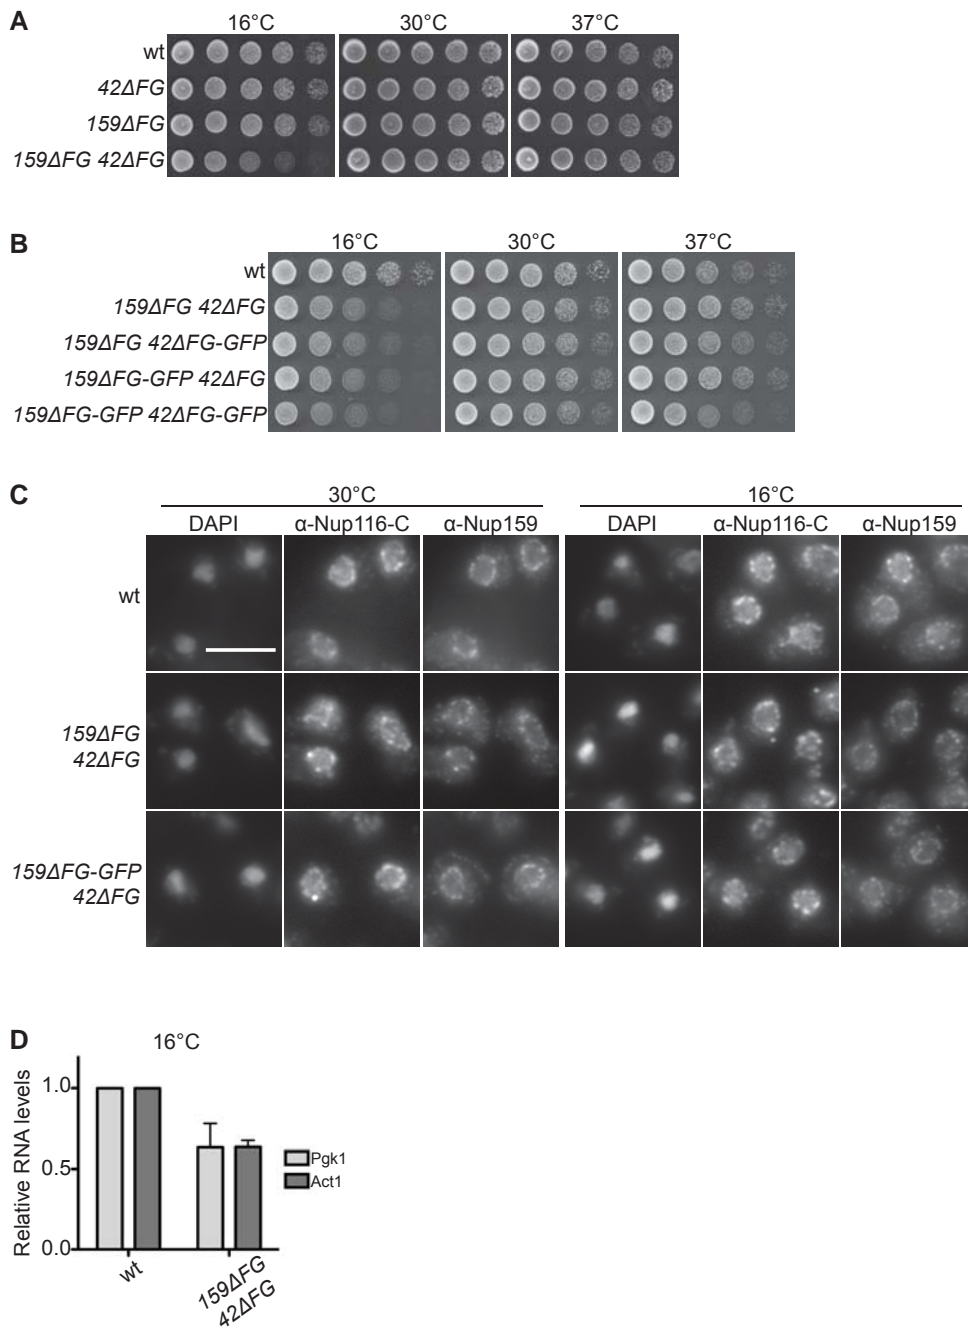

**Figure S1 The cold-sensitive mRNA export defect of *nup42ΔFG nup159ΔFG* is not due to mislocalized or non-functional *nup42* and *nup159* proteins or altered poly(A)<sup>+</sup> RNA levels.** (A) Deletion of both Nup42 and Nup159 FG domains results in a growth defect at cold temperatures. Yeast strains were grown at 30° and five-fold serially diluted on YPD plates for growth at the indicated temperature. (B) GFP fusions of *nup42ΔFG* and *nup159ΔFG* do not result in enhanced growth defects. Yeast strains were grown at 30° and five-fold serially diluted on YPD plates for growth at the indicated temperature. (C) *nup159ΔFG* and *nup159ΔFG-GFP* localize to the nuclear envelope at the permissive and restrictive temperatures. Indicated strains were grown at 30°, shifted to 16° or 30° overnight, and processed for immunofluorescence using the indicated antibodies. DAPI staining marks the nucleus. Scale bar, 5μm. (D) Steady-state levels of poly-adenylated transcripts are decreased in *nup42ΔFG nup159ΔFG*. Indicated strains were grown at 30°, shifted to 16° or 30° overnight, and total RNA was isolated. Q-PCR analysis of the resulting cDNA was performed for *Pgk1*, and *Act1*, and normalized to the non-poly-adenylated *Scr1* RNA. Wt levels were set to 1.0, and error bars indicate SEM of triplicate biological replicates. Levels are likely decreased due to feedback mechanisms that reduce transcription in mRNA export mutants.
