# Supplementary material
Source: PubMed Central journal article supplement (PMC4125395)
Supplement: dfabb8853dd9c9759e268739d82bb239_genetics.114.164012-3.pdf [file dfabb8853dd9c9759e268739d82bb239_genetics.114.164012-3.pdf]

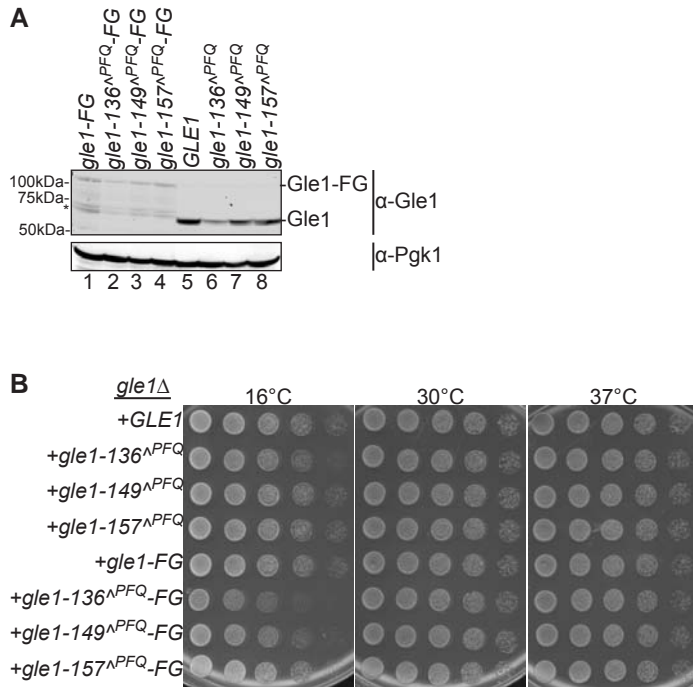

**Figure S3 *gle1-FG* constructs are expressed and show minimal growth defects.** (A) *gle1-FG* fusions are expressed.

Lysates from *gle1Δ* strains covered by the indicated vectors were separated by SDS-PAGE and immunoblotted using an  $\alpha$ -Gle1 antibody. Pgk1 was used as a loading control. (\*) Degradation products from the Nup42 FG domain. (B) *gle1<sup>NPFQ</sup>-FG* constructs display minimal growth defects. *gle1Δ* strains covered by the indicated vectors were grown at 30° and five-fold serially diluted on YPD plates for growth at the indicated temperatures.
